# Supplementary material
Source: Springer Nature journal article supplement (https://www.springermedizin.de/resource/supplementary/12935_2011_344_MOESM5_ESM.pdf/9540350)

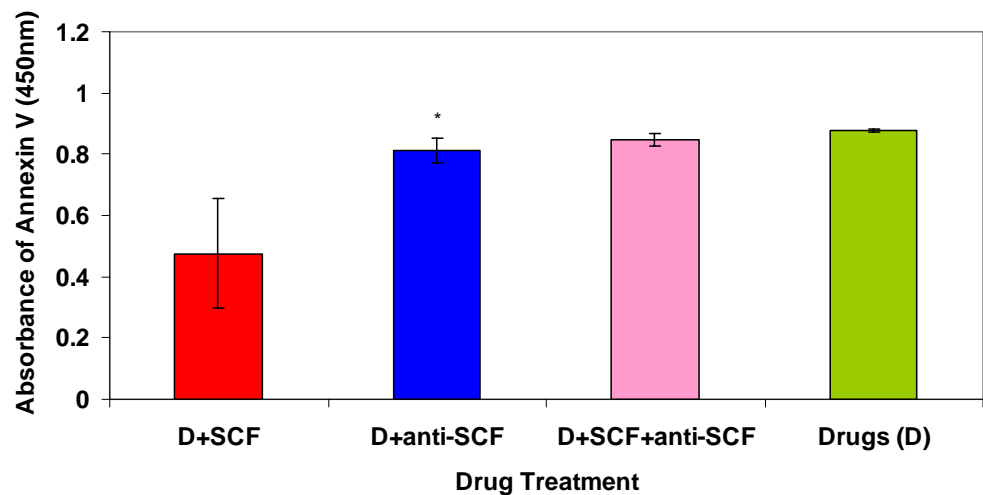

Supplement: MOESM5 [file 9540350]
